# Supplementary material for: Regulatory Effects of ABA and GA on the Expression of Conglutin Genes and LAFL Network Genes in Yellow Lupine (Lupinus luteus L.) Seeds
Source: MDPI journal article supplement (doi:10.3390/ijms241512380), 2023-08-03
Supplement: s1 [file s1]

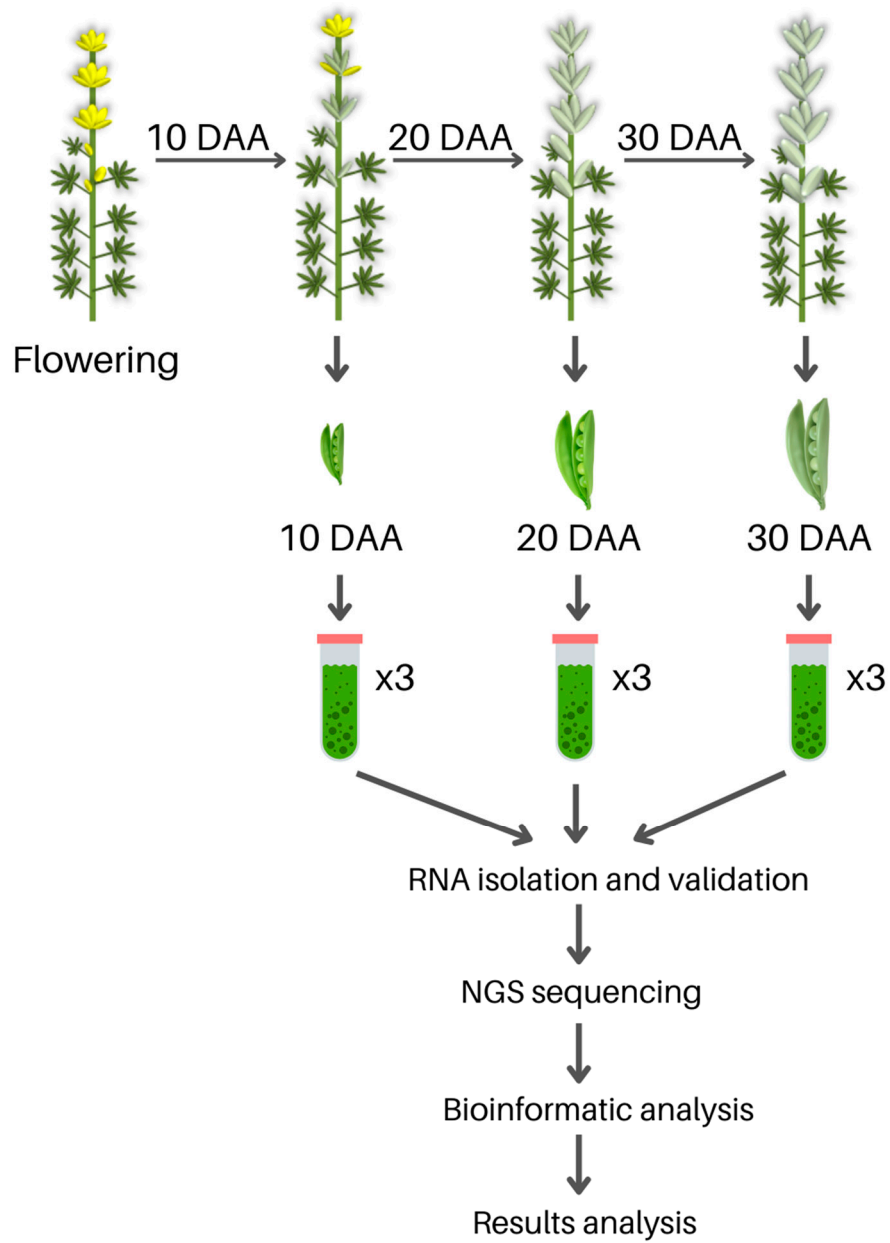

Figure S1: Schematic of the methodology and experimental setup used in the RNA-seq experiment

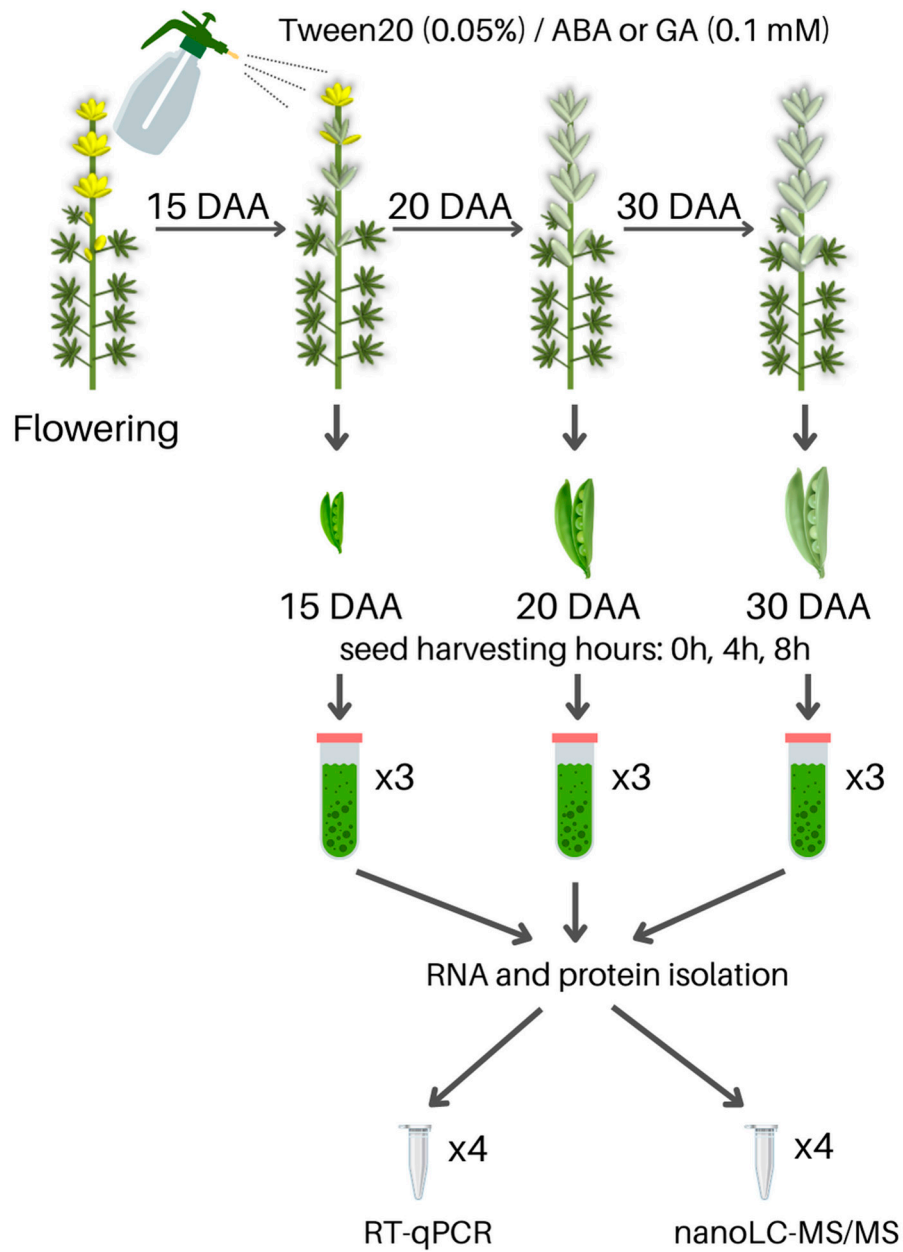

Figure S2: Schematic of the methodology and experimental set-up used to examine the effects of ABA and GA on the expression of selected genes and the amount of accumulated storage proteins
